27 **Abstract**

28 **Background**

29 The number of carotid plaques independently predicts incident atherosclerotic cardiovascular  
30 disease (ACVD).

31 However, performing vascular imaging in apparently healthy subjects is challenging, owing  
32 organizational/economical barriers. Plasma proteomics can offer an alternative approach to identify  
33 individuals with carotid plaques, at high risk of eventually developing ACVD.

34  
35 **Methods**

36 In this observational study, we studied by Normalized Protein eXpression (NPX; Olink<sup>TM</sup>), the  
37 plasma levels of 368 proteins in 664 subjects from the PLIC study, who were screened by  
38 ultrasound for the presence of carotid plaques. We clustered, by artificial intelligence, the proteins  
39 that more accurately identified subjects, stratifying them according to the number of plaques they  
40 presented with. We also study prediction of occurring events over 22 years.

41 **Results**

42 299/664 subjects had at least 1 carotid plaque. Among those, 77 subjects presented with only one  
43 plaque, 101 with 2 plaques and 121 with  $\geq 3$  plaques (3+). The remaining 365 subjects with no  
44 plaques acted as controls. The proteins differently expressed versus controls increased as a function  
45 of the number of plaques. 32 proteins were shared among the groups of subjects with plaques, but  
46 87, significantly associated with the presence of 3+ plaques, improved the AUC of the ROC,  
47 together with the ACVD risk factors, to discriminate subjects with 3+ plaques versus the AUC of  
48 the ROC considering the ACVD risk factors only (AUC= 0.918 (0.887-0.943) vs AUC= 0.760  
49 (0.716-0.801) respectively,  $p < 0.001$ ). The ACVD risk factors barely predicted the 198 occurring  
50 events (AUC= 0.559 (0.521-0.598)), but proteomics associated with plaques improved the  
51 prediction (AUC= 0.739 (0.704-0.773),  $p < 0.001$ ).

52 By analyzing the biological processes, we identified that chemotaxis/migration of leukocytes and  
53 the signaling of interleukins/cytokines were the top pathways involved.

54  
55 **Conclusions**

56 Plasma proteomics helps to identify apparently healthy subjects with higher number of carotid  
57 plaques more accurately and to predict occurring ACVDs in those individuals.

58

## 59 Introduction

60 Atherosclerotic Cardiovascular Disease (ACVD) is the leading cause of death worldwide<sup>1</sup>. In  
61 “apparently healthy” population a subset of subjects with subclinical ACVD can be detected and  
62 these subjects are identified as high, or very high, risk in contemporary cardiovascular guidelines,  
63 and carotid plaques have been suggested as a hallmark of increased ACVD risk<sup>2-4</sup>.

64 However, applying noninvasive vascular imaging procedures to detect subclinical ACVD, such as  
65 those identifying carotid plaques, is challenging in “apparently healthy” population, owing  
66 organizational, economical barriers, and given the substantial shortcomings in sensitivity and inter-  
67 operator variability<sup>5,6</sup>.

68 Plasma biomarkers have been recently used to identify people at high risk of developing<sup>7</sup> or  
69 reoccurring cardiovascular events<sup>8</sup> and accumulating evidence indicates that plasma proteins, or  
70 specific subsets of them, outperform the currently available algorithms to predict increased ACVD  
71 risk in “apparently healthy” individuals<sup>7</sup>. Yet evidence regarding their ability to inform the presence  
72 of vascular plaques is still limited, as in few studies the number of plasma proteins that have been  
73 investigated is limited to 86<sup>9,10</sup>.

74 Inflammation is known to play an important role in the onset and progression of plaques<sup>11</sup>. We  
75 therefore sought to address the question whether we could more accurately identify “apparently  
76 healthy individuals” carrying asymptomatic carotid plaques among 664 subjects from a free-living  
77 population of the northern area of Milan. To this end we studied, by Normalized Protein eXpression  
78 (NPX) (an index of relative abundance<sup>12</sup>), the plasma levels of 368 proteins from the targeted  
79 Cardio-metabolic, Inflammation, Cardiovascular II, and III panels (Olink<sup>TM</sup>). New omics techniques  
80 can inform on vascular activation of pathway related to atherosclerosis<sup>13-15</sup> and the power of  
81 proteomics as an independent marker of carotid atherosclerosis has been still proposed, albeit in a  
82 limited number of subjects and by addressing a maximum of 82 plasma proteins linked to  
83 cardiovascular disease<sup>16,17</sup>. Therefore, we searched for proteins whose expressions in plasma,  
84 recapitulating biologically relevant pathways, can improve the accuracy to identify apparently  
85 healthy subjects with asymptomatic atherosclerotic disease at the carotids and if they also could  
86 predict the occurrence of clinically overt atherosclerotic stages.

87

88

## 89 Materials and methods

### 90 Study population

91 The population was from a subgroup of subjects from the northern area of Milan, randomly selected  
92 during the basal clinical evaluation of the Progressione delle Lesioni Intimali Carotidee (“PLIC”)  
93 Study, which initially included 2.606 participants from 2001 to 2003<sup>18,19</sup>. Targeted plasma  
94 proteomics was available for 702 participants, but only 664 subjects, who did not develop ACVD  
95 before the collection of plasma, were considered for the purpose of the study (**Supplemental**  
96 **Figure 1**). Out of them, 365 were free of carotid plaques detected by ultrasound and acted as  
97 controls. The subjects’ characteristics agreed with the Sex and Gender Equity in Research (SAGER)  
98 guidelines<sup>20</sup>. The PLIC Study has been approved by the Ethics Committee of the University of  
99 Milan (SEFAP/Pr.0003). Written informed consent was obtained from subjects (all over 18 years-  
100 old), in accordance with the Declaration of Helsinki. This work is an observational study and it was  
101 conducted following the standards of the STrengthening the Reporting of OBservational studies in  
102 Epidemiology (STROBE) initiative<sup>21</sup>.

### 103 Clinical and biochemical data

104 Participants in this study were screened at the Center for the Study of Atherosclerosis at E. Bassini  
105 Hospital (Cinisello Balsamo, Milan, Italy) for the personal, familial, pathological, and

106 pharmacological clinical history. Subjects with malignancies (any type), chronic liver disease (self-  
107 reported or clinically documented in the records of the Hospital), chronic kidney disease  
108 (Glomerular Filtration Rate, GFR < 60 ml/min or documented albuminuria > 30 mg/g) and pregnant  
109 women were excluded from the study.

110 Information about lifestyle habits (physical activity, former or active smoking habit) was also  
111 collected by validated questionnaire used in the PLIC Study as described elsewhere<sup>22</sup>. Systolic and  
112 diastolic blood pressure, body mass index (BMI), waist and hip circumferences were measured. We  
113 followed the recent EAS/ESC guidelines for the diagnosis of hypertension, for the diagnosis of  
114 dyslipidemia and for the definition of the cut-off of waist circumference (>94 cm for men and >88  
115 cm for women)<sup>23</sup>. Blood samples were collected from antecubital vein after 12 hours fasting on  
116 NaEDTA tubes (BD Vacuette), centrifuged at 3,000 rpm for 12 minutes (Eppendorf 580r,  
117 Eppendorf, Hamburg, Germany) aliquoted in multiple 200 ul samples, stored at -80 degrees for the  
118 subsequent profiling of biochemical parameters (which included: total cholesterol, High-Density  
119 Lipoprotein cholesterol (HDL-C), triglycerides, ApoB, ApoA-I, glucose, Lp(a), and C-Reactive  
120 Protein (CRP)). All the measurements were performed on the aliquots, thawed for the first time,  
121 using immuno-turbidimetric and enzymatic methods thorough automatic analyzers (Randox,  
122 Crumlin, UK). Low-Density Lipoprotein cholesterol (LDL-C) was derived from Friedewald  
123 formula. Lipoprotein(a) (Lp(a)) was measured by immunoassay (Randox, Crumlin, UK).

124

## 125 **Carotid ultrasound**

126 Carotid ultrasound analysis was performed by a single expert sonographer, blinded on subject's  
127 identity and clinical history, with a linear ultrasound probe (4.0e13.0 MHz frequency, 14X48 mm  
128 footprint, 38 mm field of view, Vivid S5 GE Healthcare®, Wauwatosa, WI, USA). A detailed  
129 description of the ultrasound methodology, based on validated protocol for the PLIC study, has  
130 been published elsewhere<sup>19</sup>.

131 Carotid plaques were defined if (i) focal loci were identified and/or (ii) if the measured carotid  
132 Intima Media Thickness (IMT) was equal or above than 1.3 mm in any vascular tract (common,  
133 bulb, bifurcation, internal and external tracts) of one or both carotid arteries<sup>24</sup>.

134

## 135 **Plasma proteomics**

136 368 proteins were measured in plasma by Proximity Extension Assay (PEA) technology. The  
137 proteins are included in the Cardiovascular II, Cardiovascular III, Inflammation and Cardio-  
138 metabolic panels of Olink<sup>TM</sup> platform. The complete list of the proteins that are included in the  
139 panels, their Uniprot ID and the Olink ID, are provided by the company (<http://www.olink.com>).  
140 Proteins were measured from 200 uL of plasma samples by Proximity Extension Assay (PEA).  
141 Plasma samples from each subject was separated from whole blood by centrifugation (3,000 rpm,  
142 12 minutes at 4 degrees), aliquoted in 96-wells plates during the first clinical evaluation of each  
143 subject (between 1998 and 2000) and immediately stored at -80 degrees up to 2018, when they were  
144 sent to Olink<sup>TM</sup> (Uppsala, Sweden) for proteomic characterization<sup>7</sup>. The final assay read-out of  
145 each determination is given in Normalized Protein eXpression (NPX), which is an arbitrary unit on  
146 log<sub>2</sub>-scale where a high value corresponds to a higher protein plasma level. Each PEA measurement  
147 has a lower detection limit (LOD) calculated versus negative controls that are included in each run,  
148 and measurements of individual proteins below LOD for each panel were removed from further  
149 analysis (2 samples from Cardiometabolic panel, 29 samples from Cardiovascular II; 31 samples  
150 from the Inflammation panel; all the samples were with measurement > LOD in the Cardiovascular  
151 III panel). All assay characteristics including detection limits, the measurements of assay

152 performance, and validations are available from the manufacturer webpage (<http://www.olink.com>).  
153 All raw data can be provided upon reasonable written request to ALC.

## 154 **Statistical analysis**

### 155 Descriptive statistics

156 Clinical and biochemical data are presented as median with interquartile ranges (the lower 25th  
157 percentile and the upper 75th percentile). After checking for the type of distribution of linear  
158 variables (Shapiro-Wilk Test), we compared them between either two groups (Kolmogorov-  
159 Smirnov test) or four groups (controls, subjects with 3+, with 2 and with 1 carotid plaque), either by  
160 Analysis of Variances (ANOVA) and Bonferroni post-hoc analysis (if variables were normally  
161 distributed variables), or by Kruskal-Wallis test (if non-normally distributed variables).  
162 Dichotomous variables were compared by Fisher's chi-square test. Grubb's test for the detection of  
163 the outliers was performed for all the linear variables before running tests. P values less than 0.05  
164 were considered significant for all the statistical analyses. SPSS<sup>TM</sup> v.24 for Windows (IBM  
165 corporation®) was used for all statistical analyses. Graphs were prepared using Graphpad® (v.9.0)  
166 and Excel (Microsoft®).  
167

### 168 Machine Learning model

169 Proteomics data were analyzed by Machine Learning (ML) model, previously published for  
170 proteomics data in PLIC cohort<sup>25</sup>.  
171 In brief, the ML model consists of an eight binary outcome gradient boosting prediction model  
172 (XGboost), including the 368 proteins measured in the cohort. The XGboost model is a statistical  
173 learning technique, which produces a non-linear model in the form of an ensemble of weak  
174 prediction tree-based models. The extreme gradient boosting classification algorithm optimizes a  
175 cost function<sup>26</sup> by iteratively choosing a weak hypothesis that points in the negative gradient  
176 direction. Using a fivefold cross-validation by random reshuffling of the training set, overfitting  
177 was avoided. The XGBoost classifier model was trained in the derivation cohort with 1000 iteration  
178 round and 0.300 learning rate. Hyperparameter optimization was performed by k-fold iteration. To  
179 avoid overfitting of the models, the dataset was randomly split into a training set (70% of total  
180 sample; "train set") and the algorithm was thereafter applied to the internal validation set (30% of  
181 total sample; "test set"). We applied a permutation (randomization test) to evaluate statistical  
182 validity of the results, since standard univariate significance tests cannot be applied to the used  
183 models due to the large number of tests. By evaluating the distribution of all the results obtained in  
184 these simulations and comparing it to the true outcomes, we computed statistical significance  
185 associated with the joint panel of the selected markers. We also reported importance scores for each  
186 of the proteins that demonstrate preferences of model when constructing non-linear prediction  
187 function based on the selected biomarkers. (Random Forest classifiers). Sensitivity and specificity  
188 to predict the outcome, were performed by running analysis of Receiver Operating Curves (ROC).  
189 Comparison of AUC was performed according to the method of Hanley-McNeil. All the ML  
190 models were constructed by using Python 6.4.5 with pandas, scikit-learn, NumPy, XGboost.  
191

### 192 Gene Ontology (GO) and KEGG pathway enrichment analyses

193 We conducted enrichment analysis of biological processes with the proteins that emerged as  
194 significantly associated with carotid atherosclerosis following in silico strategies, as previously  
195 published<sup>27,28</sup>. The DAVID (The Database for Annotation, Visualization, and Integrated  
196 Discovery, NIAID, North Bethesda, MD, USA) platform was used for gene ontology (GO)  
197 enrichment analyses. The significant GO biological processes (GO\_bp) were selected for

198 Pvalue<0.05. Then, for each GO biological process (GO\_bp) we annotated the fold of enrichment,  
199 an index of the percentage of proteins belonging to a pathway, and the false discovery rate (FDR) to  
200 indicate how likely the enrichment is by chance (FDR<0.05 indicates a statistically significant  
201 enrichment of proteins in that pathway).

202

## 203 **Results**

### 204 **Increased number of plasma proteins associate with a higher number of carotid plaques.**

205

206 Out of 664 apparently healthy subjects, 299 presented with at least one plaque in one of the  
207 carotids, while 365 did not present any plaque and acted as “controls” (the clinical and biochemical  
208 parameters are reported in **Supplemental Table 1**). Out of the 299 subjects presenting at least one  
209 plaque, 77 had one, 101 subjects had 2 and 121 subjects presented with 3 or more plaques (by 3 up  
210 to 7 plaques as a maximum; herein defined as “3+”; the ultrasonographic results are reported in  
211 **Supplemental Table 2**). The analysis of the prevalence of the main ACVD risk factors showed a  
212 significant trend for active smoking, hypertension, dyslipidemia, increased waist circumference and  
213 reduced physically activity associated with an increased number of plaques (**Supplemental Table**  
214 **3**). Of note, the plasma levels of a widely used marker of chronic low-grade inflammation, CRP, did  
215 not differ among all the groups ( $P_{\text{trend}}=0.427$  **Supplemental Table 3**), while the number of plasma  
216 proteins with significantly different NPX increased as a function of the number of plaques vs  
217 controls. In fact, 17 proteins were significantly different in subjects with 1 carotid plaque compared  
218 to controls (1 reduced and 16 increased; **Figure 1A, Supplemental Table 4A**), 47 proteins were  
219 differently expressed in the plasma of the subjects with 2 plaques (4 proteins reduced and 43  
220 increased; **Figure 1B, Supplemental Table 4B**) and 97 proteins were differently expressed in  
221 subjects with 3+ plaques versus controls (9 reduced and 88 increased; **Figure 1C, Supplemental**  
222 **Table 4C**).

223 Overall, 32 shared proteins were differently expressed among subjects with increasing number of  
224 plaques versus controls. Indeed, 6 proteins, increased in subjects with 1 plaque, were also higher in  
225 subjects with 2 and in those with 3+ plaques versus controls, the NPX of 2 additional proteins were  
226 also higher in subjects with 3+ plaques only (**Table 1**) and, finally, 24 proteins, 2 reduced and 22  
227 increased in subjects with 2 plaques, were present also in subjects with 3+ plaques (**Table 1**).

228

229

### 230 **The shared proteins associated with increasing number of plaques recapitulate biological** 231 **pathways related with atherosclerosis.**

232

233 We analyzed whether the plasmatic expressions of the 32 shared proteins recapitulate biological  
234 pathways associated with the development of carotid atherosclerosis. To this end, we performed a  
235 protein-protein network (STRING v.11<sup>29</sup>) and gene ontology (GO) enrichment analyses (see  
236 methods). By interrogating *in silico* dataset, we predicted that almost all the 32 proteins could be  
237 linked into a network of possible biologically relevant pathways, with Interleukin-6 (IL6), Matrix-  
238 Metalloproteinase-9, Interleukin-18 (IL18) and plasminogen activator inhibitor 1 (SERPINE1)  
239 being central connectors (**Figure 2A**). We then deciphered this complex scenario by gene ontology  
240 (GO) enrichment analysis and, although up to 51 representative biological processes were annotated  
241 (“GO\_bp” in **Supplemental Table 5**), only 9 of them were principally represented by most of the  
242 32 proteins with a significant probability (FDR<0.05; the fold of enrichment for each GO\_bp is  
243 reported in **Supplemental Table 5**). These GO\_bp included pathways biologically relevant for the  
244 development of atherosclerosis, such as “proteolysis”, “immune response”, “cytokine-mediated  
245 signaling pathway”, “signal transduction”, “cell-cell signaling”, “positive regulation of



246 inflammatory response”, “chemotaxis” and “defense response to Gram positive bacteria” (**Figure**  
247 **2B**).

248

249 **A higher number of biological pathways associates with the presence of a higher number of**  
250 **carotid plaques.**

251 We also sought to investigate whether the additional proteins that were not shared among the  
252 groups of subjects with increasing number of plaques, inform on non-redundant biologically  
253 relevant pathways.

254 Indeed, 9 proteins (out of the 17) were differently expressed only in subjects with 1 plaque;  
255 **Supplemental Table 4A**), 17 (out of the 47) only in subjects with 2 plaques; **Supplemental Table**  
256 **4B**) and 65 (out of the 97) only in subjects with 3+ plaques (**Supplemental Table 4C**).

257 We found 5 GO\_bp that, out of 13 annotated, barely represented the presence of one carotid plaque  
258 only compared to controls ( $-\log_{10}p\text{-value} \geq 1.3$ ; **Supplemental Table 6A**) and included “viral entry  
259 into host cells” and other T-cell mediated pathways (**Figure 3A**). By contrast, the number of  
260 GO\_bp significantly associated with the presence of 2 plaques only increased up to 22 (out of 35  
261 annotated; **Figure 3B**), with only one of them being also found to be associated with the presence of  
262 1 plaque (“positive regulation of NF-kappaB transcription factor activity”; in **Supplemental Table**  
263 **6B**).

264 Finally, we found that the number of GO\_bp significantly associated with the presence of 3+  
265 plaques markedly increased up to 80 (out of 104 annotated; **Figure 3C**). It is of note that only 6 of  
266 them were also found among the pathways associated with the presence of one plaque only  
267 (“response to hypoxia”, “positive regulation of protein phosphorylation”, “signal transduction”, “T  
268 cell co-stimulation”, “positive regulation of peptidyl-serine phosphorylation”, “viral entry into host  
269 cell”) and 16 were also found among the pathways associated with the presence of 2 plaques  
270 (including pathways involved in leukocytes chemotaxis, migration, cell adhesion, inflammatory  
271 response, immune response, and other more specific, such as “positive regulation of MAP kinase  
272 activity”, “positive regulation of protein kinase B signaling”, “response to lipopolysaccharide”,  
273 “defense response to Gram- bacterium” and “antimicrobial humoral immune response mediated by  
274 antimicrobial peptide”) (**Supplemental Table 6C**).

275 This observation indicates that, especially in the presence of 3+ plaques, an increased number of  
276 proteins is linked to a larger number of pathways involved in the development of atherosclerosis.

277

278 **Plasma proteins improve the accuracy of predicting the number of carotid plaques.**

279

280 We looked for the performance of plasma proteomics to improve the capability of the classical  
281 ACVD risk factors to distinguish the apparently healthy subjects who are still exposed to carotid  
282 atherosclerosis.

283 Only the 97 proteins that were differently expressed in subjects with 3+ plaques versus controls  
284 contributed to an improvement of the ROC (AUC= 0.683 (0.601-0.785),  $p < 0.001$ ) (**Table 2**), while  
285 neither the 17 proteins that were differently expressed in subjects with only one plaque, nor the 47  
286 differently expressed in subjects with 2 plaques, exerted this performance (AUC=0.504 (0.461-  
287 0.591),  $p=0.948$  and AUC= 0.589 (0.503-0.671),  $p=0.083$ , respectively (**Table 1**)).

288 Next, to find the proteins, out of the 97, whose expression in plasma can significantly improve the  
289 accuracy to identify subjects with higher number of carotid plaques on top of the factors commonly  
290 considered for the assessment of ACVD risk, we harnessed machine learning model which listed 87  
291 important contributors for a significantly increased performance of the ROC curve. Of note, these  
292 87 proteins improved the accuracy of the classical ACVD risk factors (hypertension, active smoking  
293 habit, increased waist circumference, dyslipidemia and reduced physical activity) to identify the  
294 subjects with 3+ plaques from controls (**Supplemental Table 7** lists the proteins by descending  
295 importance factor derived from random forest classifier and their mean NPX ( $\pm$ standard error),  
296 being reduced for 5 and increased for 82 proteins in subjects with 3+ plaques vs controls). Indeed,

297 the AUC of the model including these 87 proteins together with the risk factors was markedly  
298 superior to the AUC of the model including the same ACVD risk factors alone (AUC= 0.918  
299 (0.887-0.943) vs AUC= 0.760 (0.716-0.801) respectively,  $p<0.001$ ; **Figure 4A**).

300 These findings support the concept that plasma proteomics independently predict the presence of a  
301 higher number of carotid plaques and improves our capability to identify apparently healthy  
302 subjects with diffuse carotid atherosclerosis (three or more plaques).

303

#### 304 **Plasma proteins associated with number of carotid plaques also predict occurring ACVDs.**

305

306 Finally, to study whether the proteins that identify subjects with carotid plaques, and that  
307 recapitulate biologically relevant pathways in plasma, could also improve the performance of the  
308 commonly used risk factors to predict occurring ACVDs, we followed the population over 22 (21-  
309 23) years.

310 198 events occurred over time (29.81% in the population). Overall, ACVD classical risk factors  
311 modestly predicted the occurrence of the events (AUC= 0.559 (0.521-0.598)) and were not  
312 prevalent among subjects with an incurring event. By contrast, 87 proteins that were associated with  
313 the presence of 3+ plaques (including also the 32 shared proteins) markedly improved the ROC to  
314 predict the event vs the ROC of the model with the same classical risk factors only (AUC=0.739  
315 (0.704-0.773),  $p<0.001$ ; **Figure 4B**).

316 Of note, the AUC of the ROC considering the 32 shared proteins only was also significantly higher  
317 vs the ROC considering the ACVD risk factors only ( $p=0.001$ ), although its performance was  
318 attenuated (AUC= 0.660 (0.623-0.696); **Figure 4C**).

319

#### 320 **Discussion**

321 In this study we searched for proteins, out of a set of 368 measured in plasma by PEA technology,  
322 whose expressions can recapitulate biologically relevant pathways and can also improve the  
323 accuracy to identify apparently healthy subjects presenting with carotid plaques and to predict  
324 occurring ACVDs.

325 We detected proteins whose plasmatic expression significantly discriminates subjects who, although  
326 being apparently healthy according to the analysis of the classical ACVD risk factors, present with  
327 carotid atherosclerosis versus subjects who do not display atherosclerosis and that, in our study,  
328 were considered as “controls”. Moreover, we found that the significance of this association  
329 increased as a function of the number of carotid plaques analyzed by ultrasound, and we also  
330 provide a specific set of proteins that were associated with diffuse atherosclerosis (3+ plaques).  
331 Indeed, we identified 87 proteins, which associated with the presence of three or more plaques,  
332 presenting either a reduced (5) or increased (82) plasmatic expression compared to controls. By  
333 contrast, plasma proteomics was not able to significantly discriminate neither the subjects  
334 presenting with 2 or with just one carotid plaque. The finding that proteomics did not discriminate  
335 the subjects with lower number of plaques could perhaps be due to the smaller number of subjects  
336 in these groups. Anyhow, we cannot rule out the effect of the clinical conditions that mostly  
337 contribute to hemorheological turbulence and endothelial damage, such as hypertension and  
338 smoking habit, increased waist circumference, dyslipidemia and reduced physical activity, which  
339 were prevalent in subjects with 3+ plaques but not in the subjects with 2 or with 1 plaque only  
340 versus controls and which were also associated with higher NPX values for the majority of proteins  
341 analyzed (**Supplemental Figure 2A-E**).

342 The AUC of the model combining the information of these 87 proteins with that of the classical  
343 ACVD risk factors to discriminate subjects with 3+ plaques compared to controls was markedly  
344 elevated versus the AUC of the model considering the risk factors alone. Also, this significant  
345 improvement held true between a subset of the two groups, matched for prevalence of hypertension,  
346 active smoking habit, dyslipidemia, frequency of physical activity and similar waist circumference



347 (AUC= 0.840 (0.771-0.895) of the model with proteins and ACVD risk factors vs AUC= 0.684  
348 (0.602-0.757) with ACVD risk factors alone,  $p < 0.001$ ; not shown). Therefore, this observation  
349 further supports that plasma proteomics can improve our capability to classify, with higher  
350 accuracy, individuals among the apparently healthy population towards higher degrees of ACVD  
351 risk. Anyhow, we acknowledge that larger and independent studies are needed to validate this  
352 hypothesis.

353 We also reported comparable levels of CRP, a commonly considered marker of low grade  
354 inflammation in clinics, in subjects with 3+ plaques versus controls. We do not rule out the  
355 relevance of CRP, which is generally elevated in subjects at higher ACVD risk and co-morbid  
356 patients, but we are more likely to support the possibility that pre-clinical inflammation in  
357 “apparently healthy” individuals could be recaptured more significantly by alternative sets of  
358 proteins in plasma.

359 Furthermore, by combining a high-sensitive gradient boosting machine learning strategy together  
360 with the analysis of pathways, we also provided a biological association for the large number of  
361 proteins that were predicted to be linked to the number of carotid plaques. For instance, Growth  
362 Differentiation Factor 15 (GDF-15), whose NPX was increased in subjects with 3+ plaques versus  
363 controls, ranged first out of the 87 proteins in the random forest classifier (**Supplemental Table 7**),  
364 confirming independent epidemiological studies that previously associated its increased plasma  
365 levels to ACVD risk<sup>8,30</sup>, to carotid atherosclerosis, increased carotid IMT<sup>7,9,10</sup> and high-risk  
366 coronary plaques defined by computed tomography angiography<sup>31</sup>. However, our additional GO  
367 analysis found that alternative set of proteins, including the spectrum of  $\beta$ -chemokines and other  
368 interleukins/cytokines, but not GDF-15, significantly clustered into biological pathways involved in  
369 the development of atherosclerotic process (**Supplemental Table 5** and **Supplemental table 6C**).  
370 From a translational point of view, these findings outline further mechanisms, involving immune  
371 cells chemotaxis in atherosclerotic lesions<sup>32</sup> and lymphocytes activation in the atheroma<sup>33</sup>, taking  
372 place yet during the subclinical stages of atherosclerosis.

373 Finally, the robustness of our predictions is also supported by our follow-up analysis. Indeed, the 87  
374 proteins (including the 32 shared proteins), identifying subjects with higher number of plaques,  
375 significantly predicted incident ACVDs over a large twenty-years follow-up. From a clinical  
376 standpoint, the finding that proteomics also markedly outperformed the accuracy of ACVD risk  
377 factors, further supports the possibility to overcome, by identifying individual proteomic  
378 fingerprints, the clinical algorithms which often underestimate the residual risk in apparently  
379 healthy subjects, owing a ten-year perspective for most of them.

380 Our study has some limitations, and some technical aspects of our work should be discussed.

381 First, our machine learning model, although previously demonstrated to provide superior accuracy  
382 compared to common statistical tools<sup>25</sup>, was trained and applied in internal sets of our population  
383 and, consequently, our findings need to be validated in independent cohorts.

384 Second, the methodological assessment of our proteomics analysis, although providing an optimal  
385 sensitivity to target low proteins abundance in plasma, otherwise not reachable by common  
386 techniques of molecular biology<sup>34</sup>, relies on PCR-based amplification reactions with antibodies-  
387 linked oligonucleotides. A quantitative validation of our results will add further strength; However,  
388 for some of the proteins we have identified, a validation by immunoassays has been provided<sup>34</sup>. All  
389 in all, compared existing literature using this strategy<sup>9,10,16</sup>, we have provided information from one  
390 of the largest panels so far reported.

391 In conclusion, we found plasma proteins that, informing on pathways that are biologically relevant  
392 for the development of atherosclerosis, can identify apparently healthy subjects with higher number  
393 of plaques and that outperform the classical ACVD risk factors to predict occurring atherosclerotic  
394 events.

395  
396  
397

## Acknowledgments

398 The work of A.B and A.L.C. is supported by a grant Ricerca Corrente from the Ministry of Health  
399 to IRCCS Multimedica; PRIN 2017H5F943; ERANET ER-2017-2364981 and a grant A.L.C. RF-  
400 2019-12370896  
401

402 **Conflicts of Interest:** The authors declare no Conflicts of Interest relevant to the submitted work.

403

404

## 405 **Figures and Tables Legends**

406

### 407 **Figure 1. Variations of plasma proteomics between subjects with one, with 2 and with 3+** 408 **carotid plaques compared to controls.**

409 Volcano plots showing the variation of the 368 plasma proteins in (A) subjects with 1 carotid  
410 plaque, in (B) subjects with 2 carotid plaques and (C) in subjects with 3+ plaques. All the variations  
411 are referred to controls and are calculated as fold of changes (x axis). In the y axis, the p value is  
412 reported indicating the significance of the variation.

### 413 **Figure 2. The shared proteins associated with increasing number of plaques recapitulate** 414 **biological pathways involved in atherosclerosis.**

415 (A) STRING protein-protein association network reporting the predicted connections between the  
416 32 shared proteins associated with the number of carotid plaques. (B) Bubble plot showing the most  
417 significant GO\_bp processes represented by the 32 shared plasma proteins. Each pathway is plotted  
418 for its fold of enrichment and the significance in the intensity (-log<sub>10</sub> FDR) of the signal from  
419 proteome analysis (see methods). Significant signals were considered for FDR<0.05.

### 420 **Figure 3. A higher number of biological pathways associates with the presence of a higher** 421 **number of carotid plaques.**

422 Bubble plot showing the most significant GO\_bp processes represented by (A) the unshared  
423 proteins associated the presence of one plaque only, (B) the unshared proteins associated the  
424 presence of two plaques and (C) the unshared proteins associated the presence of 3+ plaques.

### 425 **Figure 4. The plasma proteomics outperforms the ACVD risk factors in identifying subjects** 426 **with 3+ plaques and in predicting occurring atherosclerotic events.**

427 Comparison of the accuracy (Receiver Operating Curve “ROC”) of the model to discriminate: (A)  
428 subjects with 3+ plaques from the controls, when including the ACVD risk factors together with the  
429 87 proteins (including the 32 shared proteins) differently expressed in subjects with 3+ plaques (red  
430 curve) versus the accuracy of the model that included the ACVD risk factors only (blue curve); (B)  
431 subjects with incident ACVD, when including the ACVD risk factors and the 87 proteins associated  
432 with carotid plaques (including the 32 shared proteins) (red curve), versus the accuracy of the model  
433 that included the ACVD risk factors only (blue curve); (C) subjects with incident ACVD, when  
434 including the ACVD risk factors and the 32 shared proteins only (red curve), versus the accuracy of  
435 the model that included the ACVD risk factors only (blue curve); P values are derived from Hanley-  
436 McNeil test.

### 437 **Supplemental Figure 1. Study design.**

438 **Supplemental Figure 2. The plasmatic expression of several proteins associated with the**  
439 **ACVD risk factors.**

440 Volcano plots showing the variation of the 368 plasma proteins in **(A)** subjects with hypertension  
441 compared to subjects without hypertension, in **(B)** active smokers versus non-active smokers, **(C)** in  
442 subjects with higher waist circumference versus subjects with lower waist circumference, **(D)** in  
443 subjects with dyslipidemia and **(E)** in subjects who declare to practice less physical activity versus  
444 subjects who declared to practice more physical activity. All the variations are referred to controls  
445 and are calculated as fold of changes (x axis). In the y axis, the p value is reported indicating the  
446 significance of the variation.

447

448 **Table 1. Shared proteins found significantly associated among the subjects with one, two or**  
449 **with 3+ carotid plaques compared to controls.**

450 List of proteins with their name, their Uniprot-ID and their fold change in **(A)** subjects with one  
451 plaque only, in **(B)** subjects with two plaques and **(C)** in subjects with 3+ plaques. All the fold  
452 changes are referred compared to controls. Proteins that are shared between subjects with 2 and  
453 subjects with 3+ plaques only are underlined.

454

455 **Table 2. Targeted plasma proteomics outperforms the identification of carotids with higher**  
456 **number of plaques.**

457 Table reporting the parameters of the Receiving Operating Curves (ROC) for the models including  
458 the proteins differently expressed either in subjects with one plaque only, or in subjects with 2 or in  
459 subjects with 3+ plaques compared to controls. The mean Areas Under the Curve (AUC), the 95%  
460 confidence intervals (C.I.), the z-statistics and the p-value for each ROC are reported.

461

462 **References**

- 463 1. Vaduganathan M, Mensah GA, Turco JV, Fuster V, Roth GA. The Global Burden of Cardiovascular  
464 Diseases and Risk: A Compass for Future Health. *J Am Coll Cardiol* [Internet]. 2022 [cited 2023 Feb  
465 12];80:2361–2371. Available from: <https://www.jacc.org/doi/10.1016/j.jacc.2022.11.005>
- 466 2. Fernández-Friera L, Peñalvo JL, Fernández-Ortiz A, Ibañez B, López-Melgar B, Laclaustra M, Oliva B,  
467 Moco-roa A, Mendiguren J, De Vega VM, et al. Prevalence, Vascular Distribution, and Multiterritorial  
468 Extent of Subclinical Atherosclerosis in a Middle-Aged Cohort: The PESA (Progression of Early  
469 Subclinical Atherosclerosis) Study. *Circulation* [Internet]. 2015 [cited 2022 Sep 14];131:2104–2113.  
470 Available from: <https://pubmed.ncbi.nlm.nih.gov/25882487/>
- 471 3. Ibanez B, Fernández-Ortiz A, Fernández-Friera L, García-Lunar I, Andrés V, Fuster V. Progression of  
472 Early Subclinical Atherosclerosis (PESA) Study: JACC Focus Seminar 7/8. *J Am Coll Cardiol* [Internet].  
473 2021 [cited 2022 Sep 14];78:156–179. Available from: <https://pubmed.ncbi.nlm.nih.gov/34238438/>
- 474 4. Nicolaidis AN, Panayiotou AG, Griffin M, Tyllis T, Bond D, Georgiou N, Kyriacou E, Avraamides C,  
475 Martin RM. Arterial Ultrasound Testing to Predict Atherosclerotic Cardiovascular Events. *J Am Coll*  
476 *Cardiol* [Internet]. 2022;79:1969–1982. Available from: <https://pubmed.ncbi.nlm.nih.gov/35589158/>

- 477 5. McKenna MA, Bonfield MC, Robinson T. Levels of agreement in the measurements of carotid artery  
478 ultrasound across a regional vascular network. *Ultrasound* [Internet]. 2018 [cited 2023 Apr  
479 17];26:101–109. Available from: <https://pubmed.ncbi.nlm.nih.gov/30013610/>
- 480 6. Polak JF, Pencina MJ, Herrington D, O’Leary DH. Associations of edge-detected and manual-traced  
481 common carotid intima-media thickness measurements with Framingham risk factors: the multi-  
482 ethnic study of atherosclerosis. *Stroke* [Internet]. 2011 [cited 2023 Apr 17];42:1912–1916. Available  
483 from: <https://pubmed.ncbi.nlm.nih.gov/21546477/>
- 484 7. Hoogeveen RM, Pereira JPB, Nurmohamed NS, Zampoleri V, Bom MJ, Baragetti A, Boekholdt SM,  
485 Knaapen P, Khaw K-T, Wareham NJ, et al. Improved cardiovascular risk prediction using targeted  
486 plasma proteomics in primary prevention. *Eur Heart J* [Internet]. 2020 [cited 2020 Sep 9];Available  
487 from: <https://pubmed.ncbi.nlm.nih.gov/32808014/>
- 488 8. Nurmohamed NS, Belo Pereira JP, Hoogeveen RM, Kroon J, Kraaijenhof JM, Waissi F, Timmerman N,  
489 Bom MJ, Hoefler IE, Knaapen P, et al. Targeted proteomics improves cardiovascular risk prediction in  
490 secondary prevention. *Eur Heart J* [Internet]. 2022 [cited 2022 Feb 15];Available from:  
491 <https://pubmed.ncbi.nlm.nih.gov/35139537/>
- 492 9. Lind L, Gigante B, Borne Y, Mälärstig A, Sundström J, Ärnlov J, Ingelsson E, Baldassarre D, Tremoli E,  
493 Veglia F, et al. The plasma protein profile and cardiovascular risk differ between intima-media  
494 thickness of the common carotid artery and the bulb: A meta-analysis and a longitudinal evaluation.  
495 *Atherosclerosis* [Internet]. 2020 [cited 2023 Apr 17];295:25–30. Available from:  
496 <https://pubmed.ncbi.nlm.nih.gov/31981948/>
- 497 10. Lind L, Gigante B, Borné Y, Feldreich T, Leppert J, Hedberg P, Ostgren CJ, Nystrom FH, Sundstrom J,  
498 Arnlov J, et al. Plasma Protein Profile of Carotid Artery Atherosclerosis and Atherosclerotic  
499 Outcomes: Meta-Analyses and Mendelian Randomization Analyses. *Arterioscler Thromb Vasc Biol*  
500 [Internet]. 2021 [cited 2021 Dec 26];41:1777–1788. Available from:  
501 <https://www.ahajournals.org/doi/abs/10.1161/ATVBAHA.120.315597>
- 502 11. Libby P. Inflammation in Atherosclerosis - No Longer a Theory. *Clin Chem*. 2021;67:131–142.
- 503 12. What is NPX? - Olink [Internet]. [cited 2022 Sep 2];Available from: [https://www.olink.com/faq/what-](https://www.olink.com/faq/what-is-npx/)  
504 [is-npx/](https://www.olink.com/faq/what-is-npx/)
- 505 13. Joshi A, Rienks M, Theofilatos K, Mayr M. Systems biology in cardiovascular disease: a multiomics  
506 approach. *Nat Rev Cardiol* [Internet]. 2021;18:313–330. Available from:  
507 <https://pubmed.ncbi.nlm.nih.gov/33340009/>
- 508 14. Nurmohamed NS, Kraaijenhof JM, Mayr M, Nicholls SJ, Koenig W, Catapano AL, Stroes ESG.  
509 Proteomics and lipidomics in atherosclerotic cardiovascular disease risk prediction. *Eur Heart J*  
510 [Internet]. 2023;Available from: <https://pubmed.ncbi.nlm.nih.gov/36988179/>
- 511 15. Borrelli A, Marrano N, Biondi G, Rella M, Roberto L, Cignarelli A, Perrini S, Laviola L, Giorgino F,  
512 Natalicchio A, et al. Acute ischemic stroke: how to investigate the association between disease  
513 etiology and gene expression profiles: Selected Abstract – Spring Meeting 2023. *European*  
514 *Atherosclerosis Journal* [Internet]. 2023 [cited 2023 Sep 8];2:20–20. Available from:  
515 <https://www.eathj.org/index.php/eaj/article/view/32>
- 516 16. Sandstedt J, Vargmar K, Björkman K, Ruetschi U, Bergström G, Hultén LM, Skiöldebrand E. COMP  
517 (Cartilage Oligomeric Matrix Protein) Neoepitope: A Novel Biomarker to Identify Symptomatic  
518 Carotid Stenosis. *Arterioscler Thromb Vasc Biol* [Internet]. 2021;41:1218–1228. Available from:  
519 <https://pubmed.ncbi.nlm.nih.gov/33472398/>

- 520 17. Lind L, Ärnlöv J, Lindahl B, Siegbahn A, Sundström J, Ingelsson E. Use of a proximity extension assay  
521 proteomics chip to discover new biomarkers for human atherosclerosis. *Atherosclerosis* [Internet].  
522 2015;242:205–210. Available from: <https://pubmed.ncbi.nlm.nih.gov/26204497/>
- 523 18. Olmastroni E, Baragetti A, Casula M, Grigore L, Pellegatta F, Pirillo A, Tragni E, Catapano AL.  
524 Multilevel Models to Estimate Carotid Intima-Media Thickness Curves for Individual Cardiovascular  
525 Risk Evaluation. *Stroke* [Internet]. 2019 [cited 2019 Jul 8];50:1758–1765. Available from:  
526 <http://www.ncbi.nlm.nih.gov/pubmed/31164073>
- 527 19. Baragetti A, Mattavelli E, Grigore L, Pellegatta F, Magni P, Catapano AL. Targeted Plasma Proteomics  
528 to Predict the Development of Carotid Plaques. *Stroke* [Internet]. 2022 [cited 2022 Sep 1];53.  
529 Available from: <https://pubmed.ncbi.nlm.nih.gov/35775410/>
- 530 20. Heidari S, Babor TF, De Castro P, Tort S, Curno M. Sex and Gender Equity in Research: rationale for  
531 the SAGER guidelines and recommended use. *Res Integr Peer Rev* [Internet]. 2016 [cited 2022 Dec  
532 15];1:1–9. Available from:  
533 <https://researchintegrityjournal.biomedcentral.com/articles/10.1186/s41073-016-0007-6>
- 534 21. von Elm E, Altman DG, Egger M, Pocock SJ, Gøtzsche PC, Vandenbroucke JP. The Strengthening the  
535 Reporting of Observational Studies in Epidemiology (STROBE) statement: guidelines for reporting  
536 observational studies. *Lancet* [Internet]. 2007;370:1453–1457. Available from:  
537 <https://pubmed.ncbi.nlm.nih.gov/18064739/>
- 538 22. Baragetti A, Severgnini M, Olmastroni E, Dioguardi C, Mattavelli E, Angius A, Rotta L, Cibella J,  
539 Caredda G, Consolandi C, et al. Gut Microbiota Functional Dysbiosis Relates to Individual Diet in  
540 Subclinical Carotid Atherosclerosis. *Nutrients* [Internet]. 2021;13:1–19. Available from:  
541 <https://pubmed.ncbi.nlm.nih.gov/33494335/>
- 542 23. Mach F, Baigent C, Catapano AL, Koskinas KC, Casula M, Badimon L, Chapman MJ, Backer GG De,  
543 Delgado V, Ference BA, et al. 2019 ESC/EAS Guidelines for the management of dyslipidaemias: Lipid  
544 modification to reduce cardiovascular risk. *Eur Heart J*. 2020;41:111–188.
- 545 24. Johri AM, Nambi V, Naqvi TZ, Feinstein SB, Kim ESH, Park MM, Becher H, Sillesen H.  
546 Recommendations for the Assessment of Carotid Arterial Plaque by Ultrasound for the  
547 Characterization of Atherosclerosis and Evaluation of Cardiovascular Risk: From the American  
548 Society of Echocardiography. *Journal of the American Society of Echocardiography*. 2020;33:917–  
549 933.
- 550 25. Unterhuber M, Kresoja KP, Rommel KP, Besler C, Baragetti A, Klötting N, Ceglarek U, Blüher M, Scholz  
551 M, Catapano AL, et al. Proteomics-Enabled Deep Learning Machine Algorithms Can Enhance  
552 Prediction of Mortality. *J Am Coll Cardiol* [Internet]. 2021 [cited 2021 Dec 26];78:1621–1631.  
553 Available from: <https://pubmed.ncbi.nlm.nih.gov/34649700/>
- 554 26. <https://www.javatpoint.com/cost-function-in-machine-learning>.
- 555 27. Baragetti A, Da Dalt L, Moregola A, Svecla M, Terenghi O, Mattavelli E, De Gaetano LN, Uboldi P,  
556 Catapano AL, Norata GD. Neutrophil aging exacerbates high fat diet induced metabolic alterations.  
557 *Metabolism*. 2023;144.
- 558 28. Nour J, Moregola A, Svecla M, Da Dalt L, Bellini R, Neyrolles O, Fadini GP, Rombouts Y, Albiero M,  
559 Bonacina F, et al. Mannose Receptor Deficiency Impacts Bone Marrow and Circulating Immune Cells  
560 during High Fat Diet Induced Obesity. *Metabolites*. 2022;12.



- 561 29. Szklarczyk D, Gable AL, Lyon D, Junge A, Wyder S, Huerta-Cepas J, Simonovic M, Doncheva NT,  
562 Morris JH, Bork P, et al. STRING v11: Protein-protein association networks with increased coverage,  
563 supporting functional discovery in genome-wide experimental datasets. *Nucleic Acids Res.*  
564 2019;47:D607–D613.
- 565 30. Wallentin L, Eriksson N, Olszowka M, Grammer TB, Hagström E, Held C, Kleber ME, Koenig W, März  
566 W, Stewart RAH, et al. Plasma proteins associated with cardiovascular death in patients with chronic  
567 coronary heart disease: A retrospective study. *PLoS Med* [Internet]. 2021 [cited 2023 Apr 18];18.  
568 Available from: <https://pubmed.ncbi.nlm.nih.gov/33439866/>
- 569 31. Bom MJ, Levin E, Driessen RS, Danad I, Van Kuijk CC, van Rossum AC, Narula J, Min JK, Leipsic JA,  
570 Belo Pereira JP, et al. Predictive value of targeted proteomics for coronary plaque morphology in  
571 patients with suspected coronary artery disease. *EBioMedicine* [Internet]. 2019 [cited 2022 Sep  
572 1];39:109–117. Available from: <https://pubmed.ncbi.nlm.nih.gov/30587458/>
- 573 32. de Jager SCA; BI, KAOKSJABM van SPJ van BTJCKJBEAL. Leukocyte-specific CCL3 deficiency inhibits  
574 atherosclerotic lesion development by affecting neutrophil accumulation.
- 575 33. Schaller TH, Batich KA, Suryadevara CM, Desai R, Sampson JH. Chemokines as adjuvants for  
576 immunotherapy: implications for immune activation with CCL3. *Expert Rev Clin Immunol.*  
577 2017;13:1049–1060.
- 578 34. Joshi A, Rienks M, Theofilatos K, Mayr M. Systems biology in cardiovascular disease: a multiomics  
579 approach. *Nat Rev Cardiol* [Internet]. 2021 [cited 2021 Oct 23];18:313–330. Available from:  
580 <https://pubmed.ncbi.nlm.nih.gov/33340009/>
- 581
- 582
- 583

584 **Table 1. Shared proteins found significantly associated among the subjects with one, two or**  
 585 **with 3+ carotid plaques compared to controls.**

(A)

(B)

(C)

586

| Protein          | Uniprot ID | fold change | Protein          | Uniprot ID | fold change | p value | Protein          | Uniprot ID | fold change | p value |
|------------------|------------|-------------|------------------|------------|-------------|---------|------------------|------------|-------------|---------|
| <b>TFPI</b>      | P10646     | 0,01        | <b>TNFRSF10A</b> | O00220     | 0,05        | 3,60    | <b>GDF15</b>     | Q99988     | 0,05        | 6,95    |
| <b>APN</b>       | P15144     | 0,02        | <b>HAVCR1</b>    | Q96D42     | 0,04        | 3,57    | <b>IL6</b>       | P05231     | 0,10        | 5,68    |
| <b>IL1RT2</b>    | P27930     | 0,02        | <b>CSTB</b>      | P04080     | 0,04        | 3,20    | <b>HAVCR1</b>    | Q96D42     | 0,05        | 5,62    |
| <b>TNFSF13B</b>  | Q9Y275     | 0,01        | <b>IL18</b>      | Q14116     | 0,04        | 3,14    | <b>PRSS8</b>     | Q16651     | 0,02        | 5,55    |
| <b>CPB1</b>      | P15086     | 0,03        | <b>IGFBP7</b>    | Q16270     | 0,02        | 2,75    | <b>CSTB</b>      | P04080     | 0,05        | 5,31    |
| <b>CPA1</b>      | P15085     | 0,04        | <b>GDF15</b>     | Q99988     | 0,03        | 2,62    | <b>TNFSF13B</b>  | Q9Y275     | 0,02        | 5,10    |
| <b>TNFRSF10A</b> | O00220     | 0,03        | <b>PON3</b>      | Q15166     | -0,06       | 2,53    | <b>HGF</b>       | P14210     | 0,03        | 4,85    |
| <b>IL16</b>      | Q14005     | 0,04        | <b>PAI1</b>      | P05121     | 0,05        | 2,46    | <b>CHI3L1</b>    | P36222     | 0,05        | 4,47    |
|                  |            |             | <b>CTSD</b>      | P07339     | 0,03        | 2,38    | <b>IL18</b>      | Q14116     | 0,04        | 4,26    |
|                  |            |             | <b>TRAP6</b>     | P13686     | 0,07        | 2,18    | <b>IGFBP7</b>    | Q16270     | 0,02        | 3,97    |
|                  |            |             | <b>PCOLCE</b>    | Q15113     | 0,04        | 2,04    | <b>TRAP6</b>     | P13686     | 0,09        | 3,69    |
|                  |            |             | <b>HGF</b>       | P14210     | 0,02        | 1,98    | <b>TNFRSF10A</b> | O00220     | 0,04        | 3,25    |
|                  |            |             | <b>PRSS8</b>     | Q16651     | 0,01        | 1,87    | <b>PLAUR</b>     | Q03405     | 0,03        | 3,25    |
|                  |            |             | <b>IL6</b>       | P05231     | 0,06        | 1,86    | <b>CTSD</b>      | P07339     | 0,03        | 3,23    |
|                  |            |             | <b>PGF</b>       | P49763     | 0,01        | 1,83    | <b>PGF</b>       | P49763     | 0,02        | 3,11    |
|                  |            |             | <b>IL7R</b>      | P16871     | -0,09       | 1,72    | <b>IL7R</b>      | P16871     | -0,12       | 2,98    |
|                  |            |             | <b>CHI3L1</b>    | P36222     | 0,03        | 1,70    | <b>IL1RT2</b>    | P27930     | 0,02        | 2,85    |
|                  |            |             | <b>CPB1</b>      | P15086     | 0,03        | 1,65    | <b>TFPI</b>      | P10646     | 0,01        | 2,72    |
|                  |            |             | <b>APN</b>       | P15144     | 0,02        | 1,63    | <b>IL16</b>      | Q14005     | 0,04        | 2,45    |
|                  |            |             | <b>CCL20</b>     | P78556     | 0,04        | 1,61    | <b>TNFR1</b>     | P19438     | 0,02        | 2,30    |
|                  |            |             | <b>IL1RT2</b>    | P27930     | 0,01        | 1,61    | <b>MMP9</b>      | P14780     | 0,05        | 2,28    |

|                     |              |             |             |                     |              |              |             |
|---------------------|--------------|-------------|-------------|---------------------|--------------|--------------|-------------|
| <b><u>PLAUR</u></b> | <u>Q0340</u> |             |             | <b><u>CEACA</u></b> | <u>P3199</u> |              |             |
|                     | <u>5</u>     | <u>0,02</u> | <u>1,53</u> | <b><u>M8</u></b>    | <u>7</u>     | <u>0,06</u>  | <u>2,22</u> |
| <b><u>CEACA</u></b> | <u>P3199</u> |             |             | <b><u>APN</u></b>   | <u>P1514</u> |              |             |
|                     | <u>7</u>     | <u>0,05</u> | <u>1,50</u> |                     | <u>4</u>     | <u>0,02</u>  | <u>2,16</u> |
| <b><u>MMP9</u></b>  | <u>P1478</u> |             |             | <b><u>CCL16</u></b> | <u>O1546</u> |              |             |
|                     | <u>0</u>     | <u>0,04</u> | <u>1,42</u> |                     | <u>7</u>     | <u>0,02</u>  | <u>2,09</u> |
| <b><u>TNFR1</u></b> | <u>P1943</u> |             |             | <b><u>LOX1</u></b>  | <u>P7838</u> |              |             |
|                     | <u>8</u>     | <u>0,01</u> | <u>1,41</u> |                     | <u>0</u>     | <u>0,03</u>  | <u>2,02</u> |
| <b><u>IL16</u></b>  | <u>Q1400</u> |             |             | <b><u>PCSK9</u></b> | <u>Q8NB</u>  |              |             |
|                     | <u>5</u>     | <u>0,03</u> | <u>1,39</u> |                     | <u>P7</u>    | <u>0,03</u>  | <u>2,01</u> |
| <b><u>LOX1</u></b>  | <u>P7838</u> |             |             | <b><u>PAI</u></b>   | <u>P0512</u> |              |             |
|                     | <u>0</u>     | <u>0,03</u> | <u>1,35</u> |                     | <u>1</u>     | <u>0,04</u>  | <u>1,88</u> |
| <b><u>CCL16</u></b> | <u>O1546</u> |             |             | <b><u>CCL20</u></b> | <u>P7855</u> |              |             |
|                     | <u>7</u>     | <u>0,02</u> | <u>1,34</u> |                     | <u>6</u>     | <u>0,04</u>  | <u>1,72</u> |
| <b><u>CPA1</u></b>  | <u>P1508</u> |             |             | <b><u>CPA1</u></b>  | <u>P1508</u> |              |             |
|                     | <u>5</u>     | <u>0,03</u> | <u>1,34</u> |                     | <u>5</u>     | <u>0,03</u>  | <u>1,64</u> |
| <b><u>PCSK9</u></b> | <u>Q8NB</u>  |             |             | <b><u>CPB1</u></b>  | <u>P1508</u> |              |             |
|                     | <u>P7</u>    | <u>0,03</u> | <u>1,30</u> |                     | <u>6</u>     | <u>0,03</u>  | <u>1,58</u> |
|                     |              |             |             | <b><u>PCOLC</u></b> | <u>Q1511</u> |              |             |
|                     |              |             |             | <b><u>E</u></b>     | <u>3</u>     | <u>0,05</u>  | <u>1,63</u> |
|                     |              |             |             | <b><u>PON3</u></b>  | <u>Q1516</u> |              |             |
|                     |              |             |             |                     | <u>6</u>     | <u>-0,04</u> | <u>1,36</u> |

587

588

589 **Table 2. Targeted plasma proteomics outperforms the identification of carotids with higher**  
 590 **number of plaques.**

| <b>Performance of the models to distinguish:</b> | <b>AUC</b> | <b>Standard error</b> | <b>95% C.I. (lower-upper)</b> | <b>z-statistic</b> | <b>p-value</b> |
|--------------------------------------------------|------------|-----------------------|-------------------------------|--------------------|----------------|
| <b>Number of plaques</b>                         |            |                       |                               |                    |                |
| 1 plaque vs controls                             | 0.504      | 0.0561                | 0.461-0.591                   | 0.065              | 0.948          |
| 2 plaques vs controls                            | 0.589      | 0.0513                | 0.503-671                     | 1.735              | 0.083          |
| 3+ plaques vs controls                           | 0.683      | 0.0471                | 0.601-0.785                   | 3.892              | <0.001         |

591

592

593

594

595

596

597

**(A) 1 vs no carotid plaques**

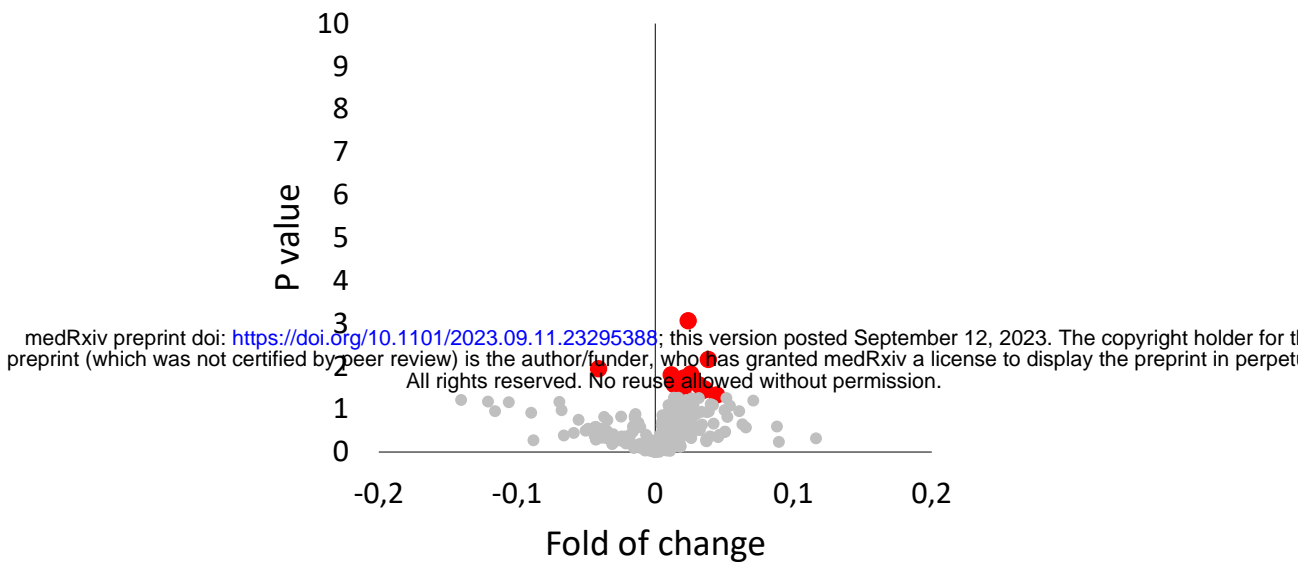

**(B) 2 vs no carotid plaques**

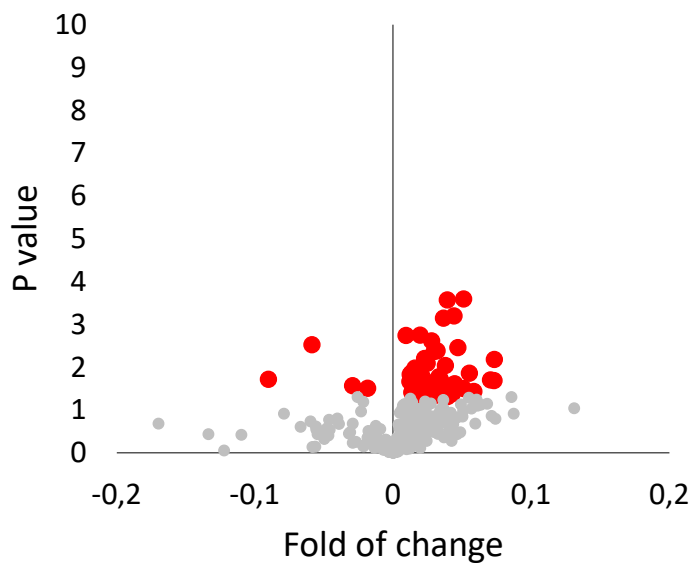

**(C) 3+ vs no carotid plaques**

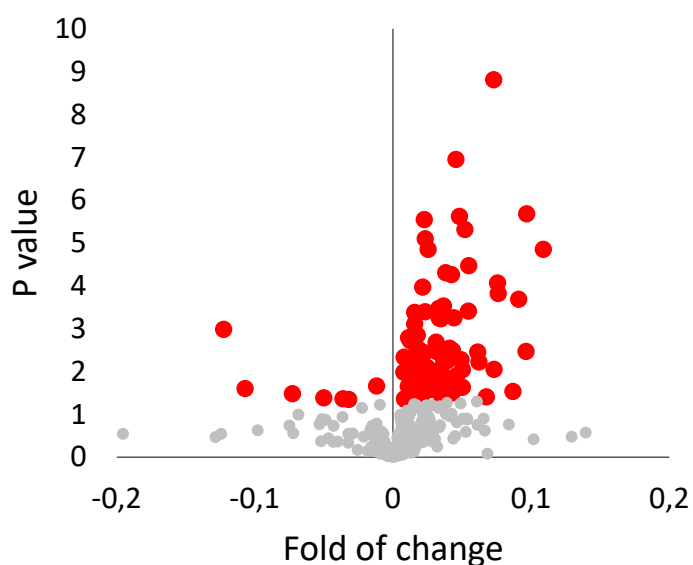

- Proteins with significant variation**
- Proteins with no significant variation**

**Figure 1.**

(A)

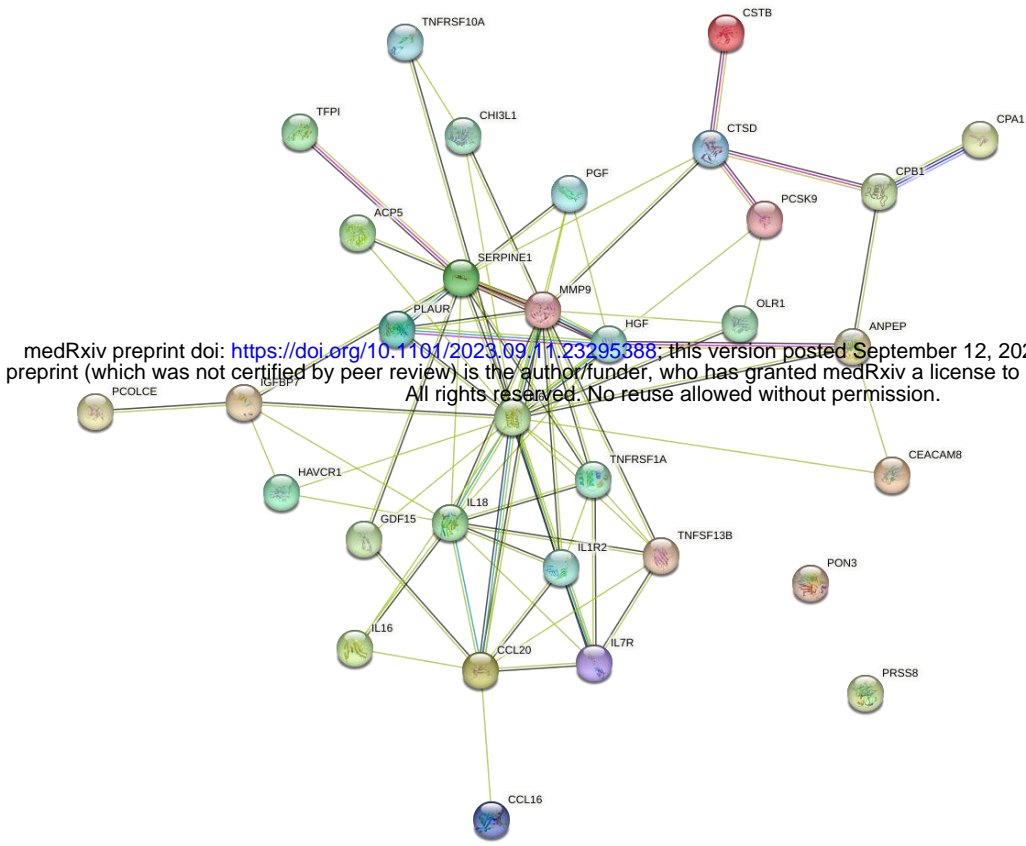

(B)

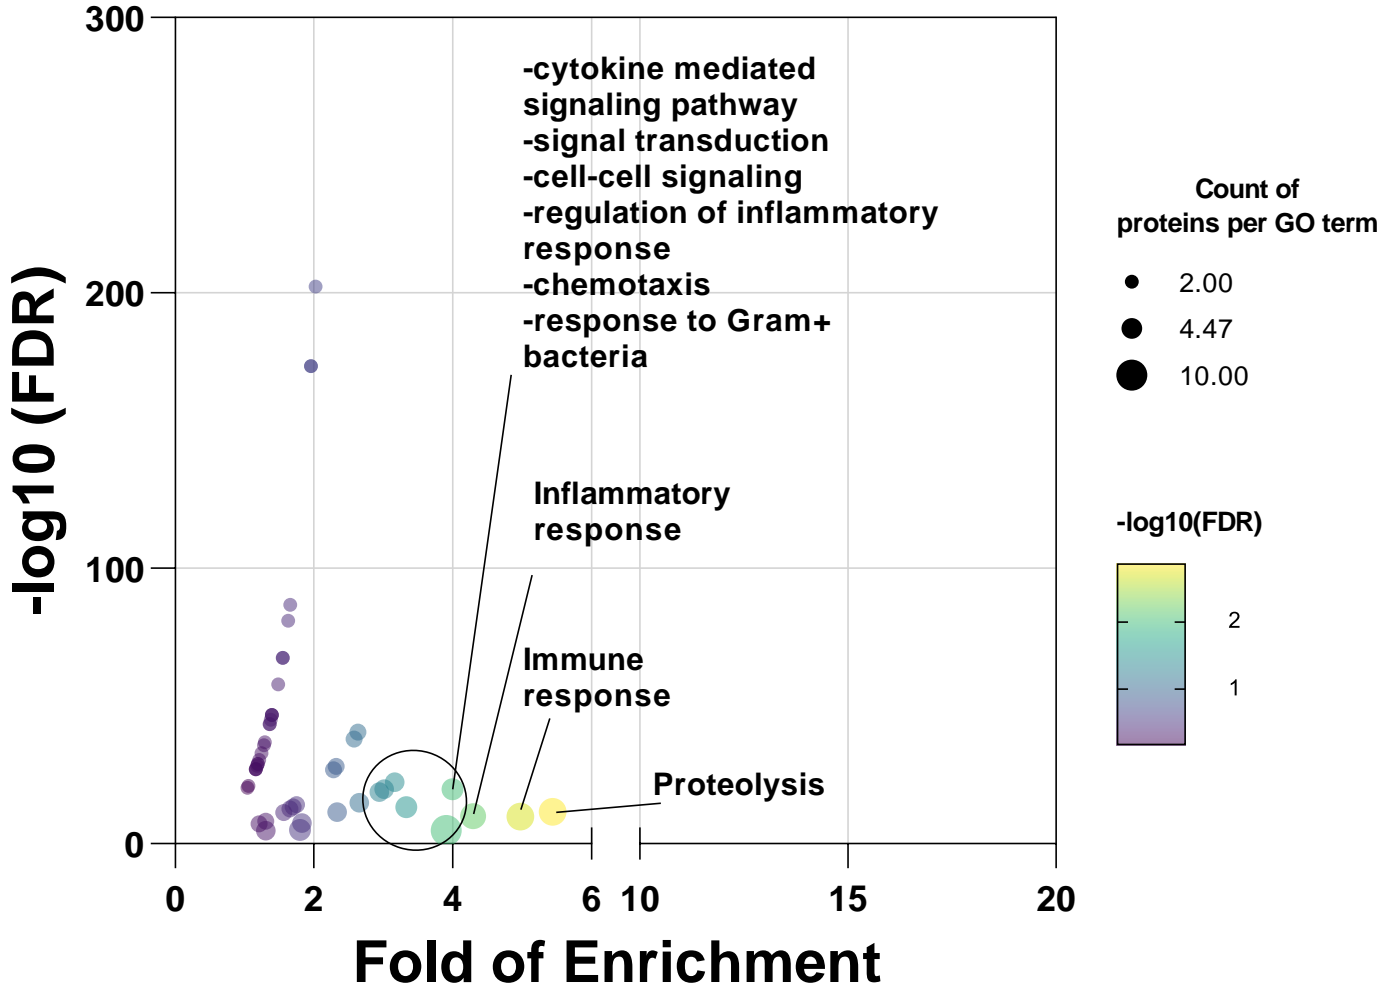

Figure 2.



**(A) Biological pathways enriched with the proteins associated with the presence of 1 carotid plaque only**

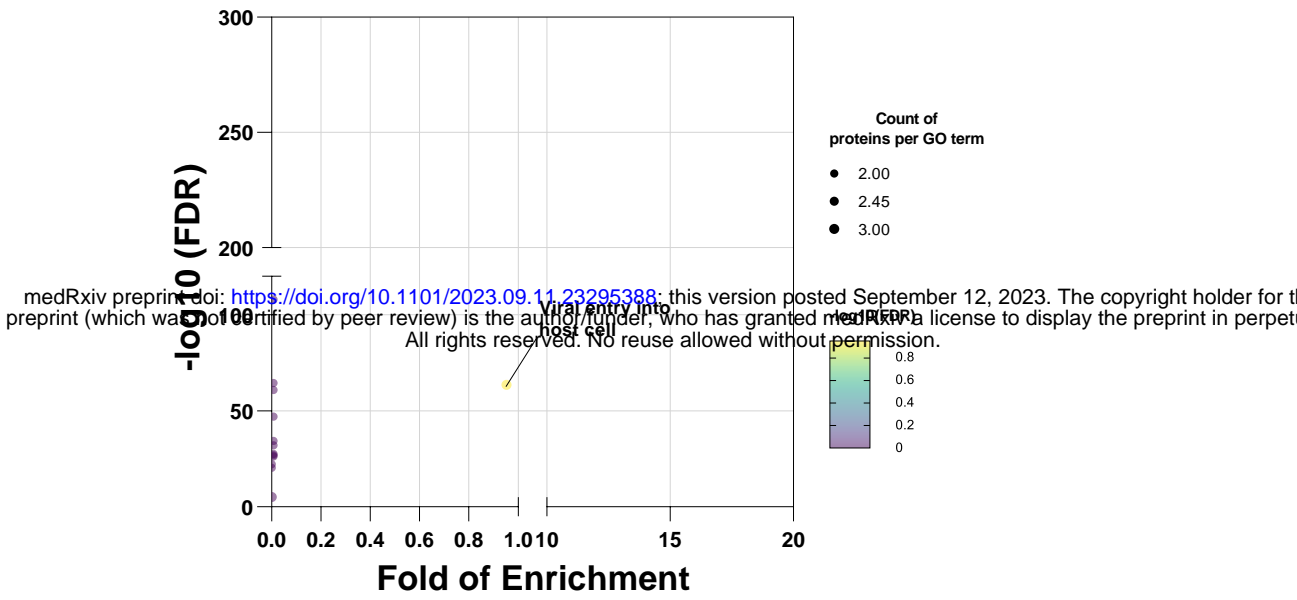

**(B) Biological pathways enriched with the proteins associated with the presence of 2 carotid plaques only**

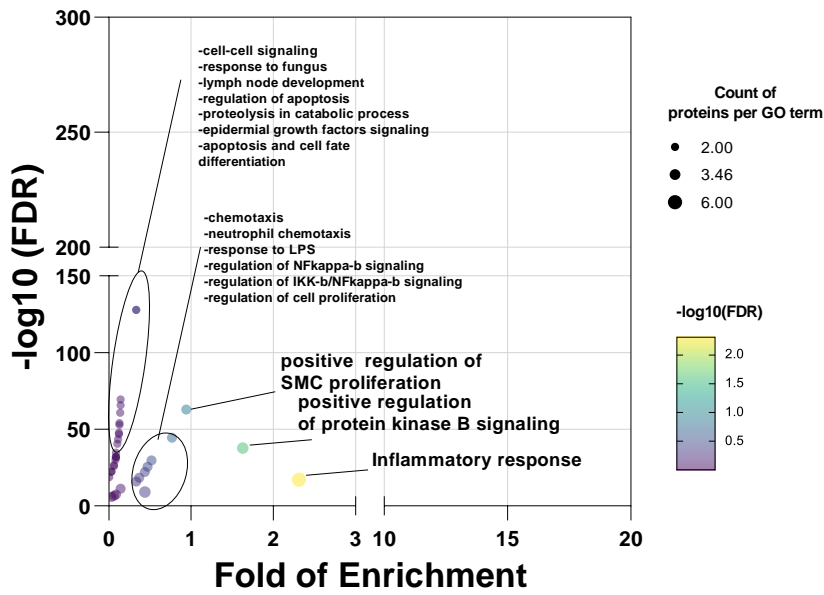

**(C) Biological pathways enriched with the proteins associated with the presence of 3+ carotid plaques only**

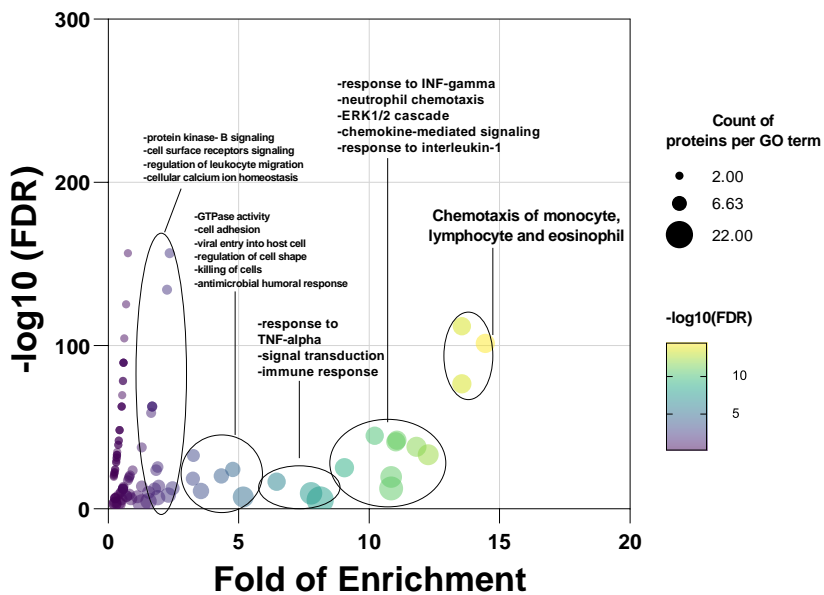

**Figure 3.**

**(A) Performance of 87 proteins in identifying 3+ plaques**

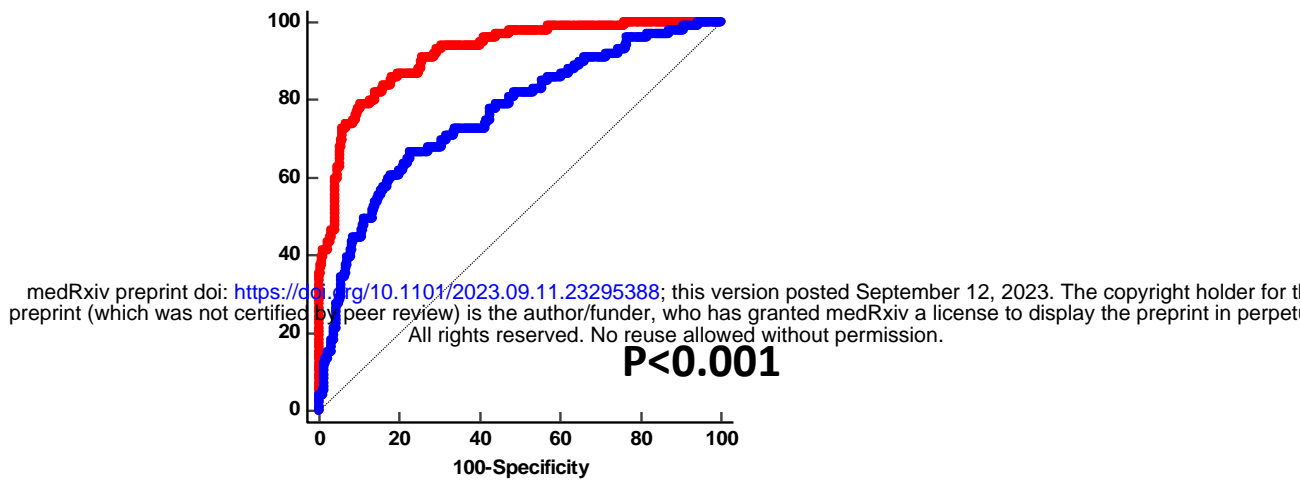

**(B) Performance of all the proteins associated with plaques in predicting occurring ACVDs**

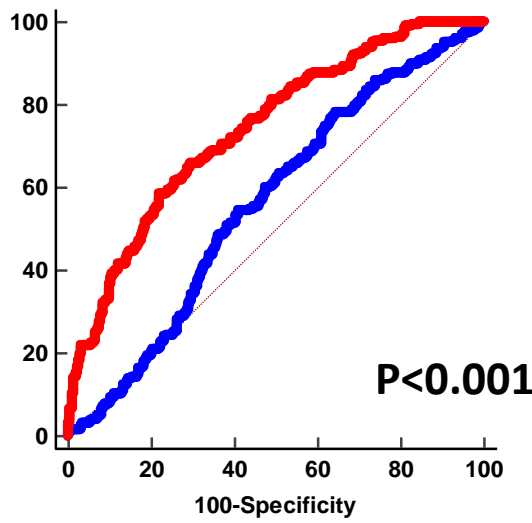

**(C) Performance of 32 shared proteins in predicting occurring ACVDs**

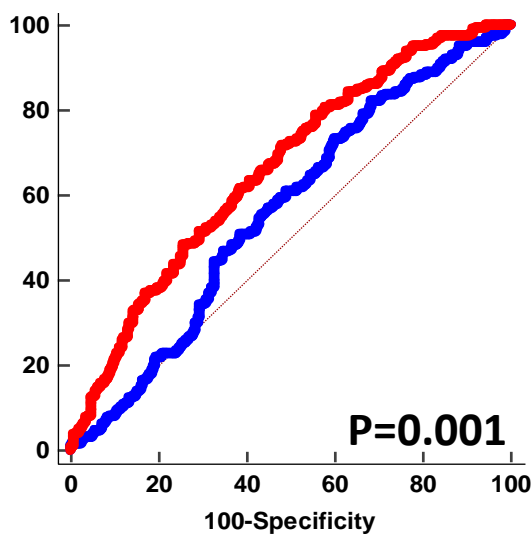

**Figure 4.**

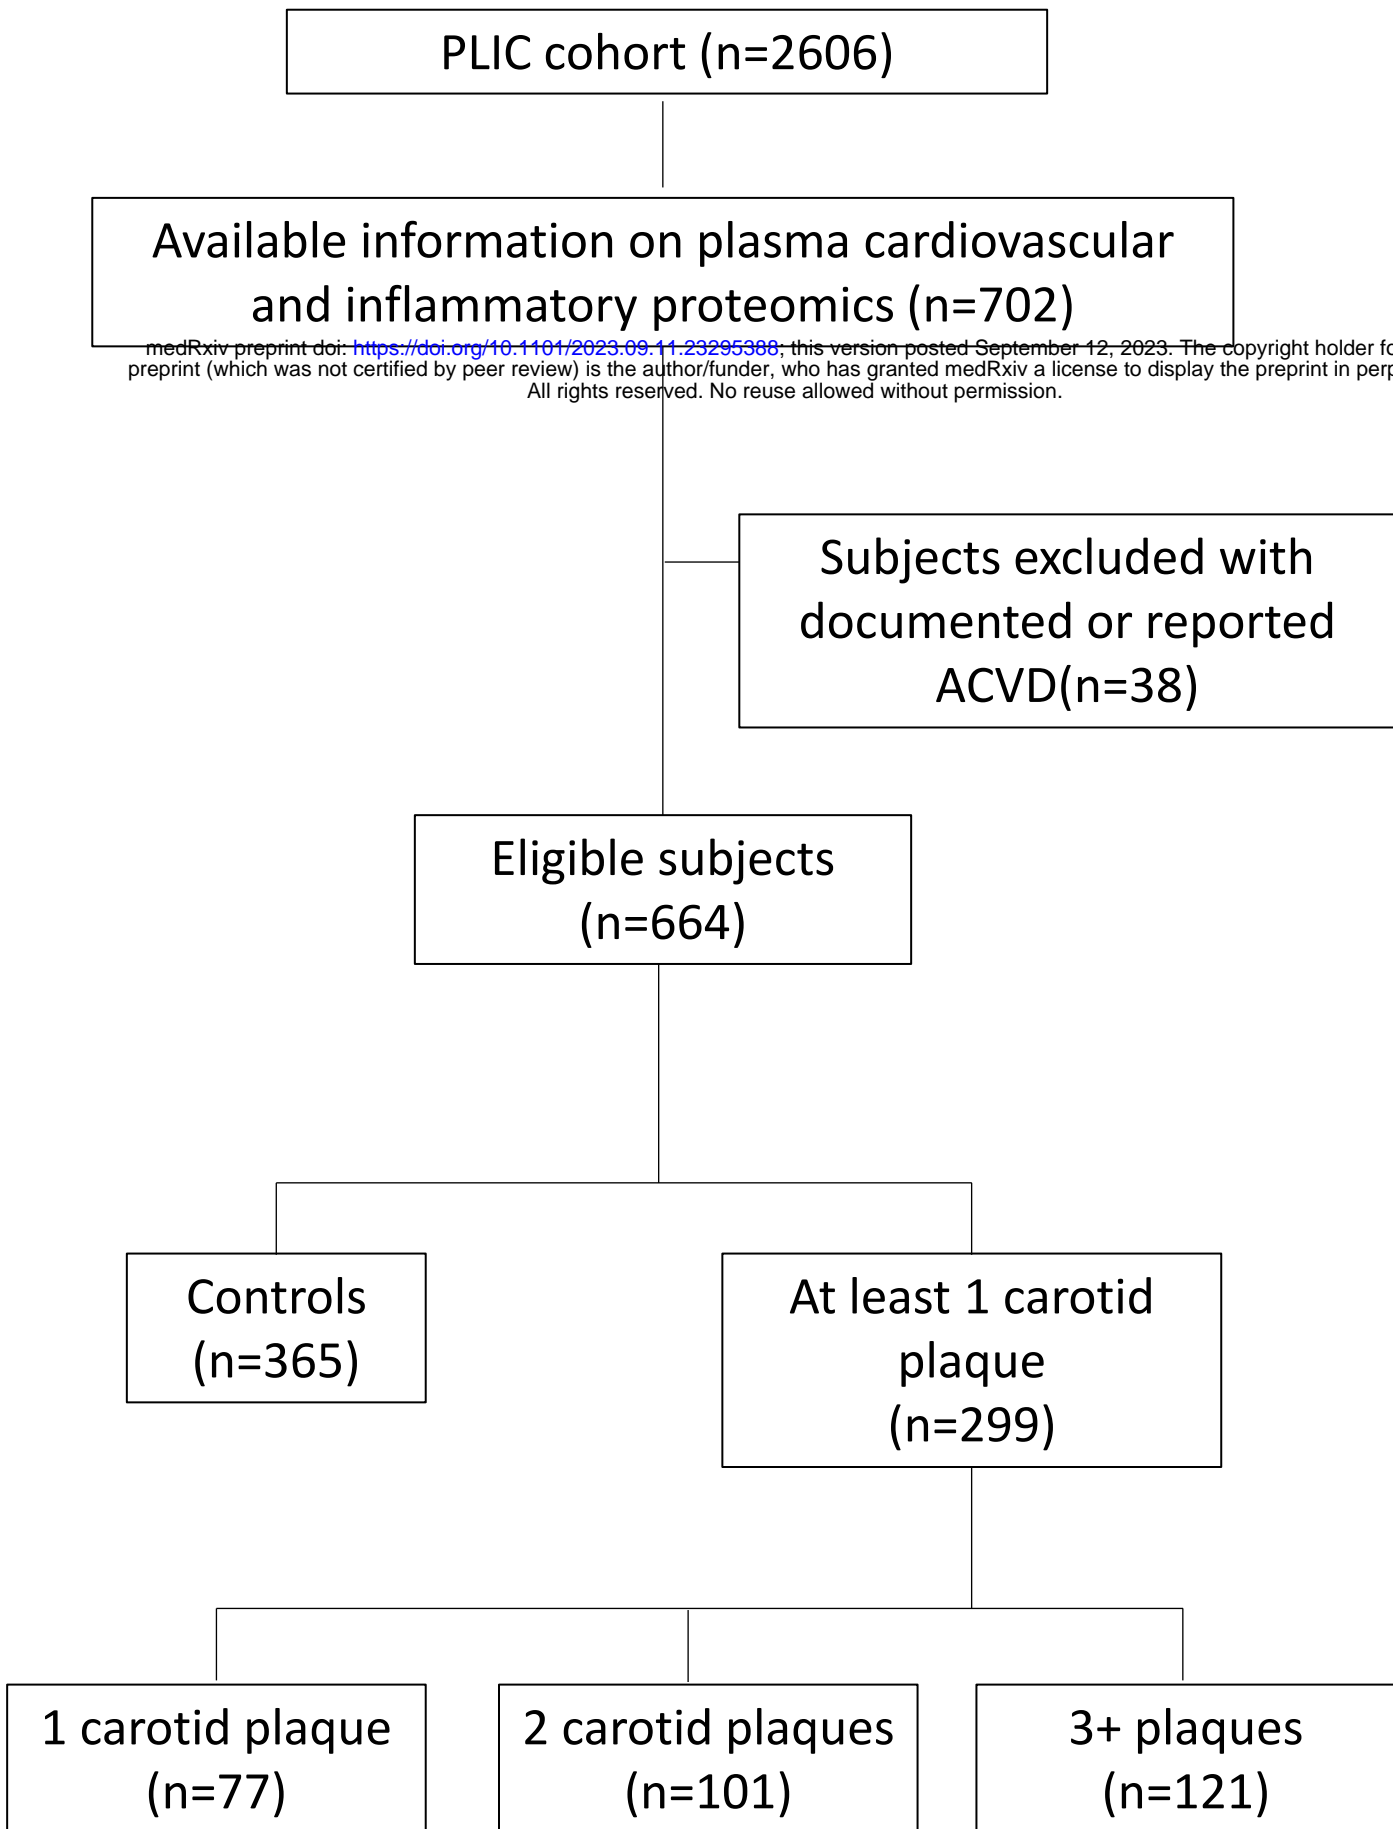

**Supplemental Figure 1.**

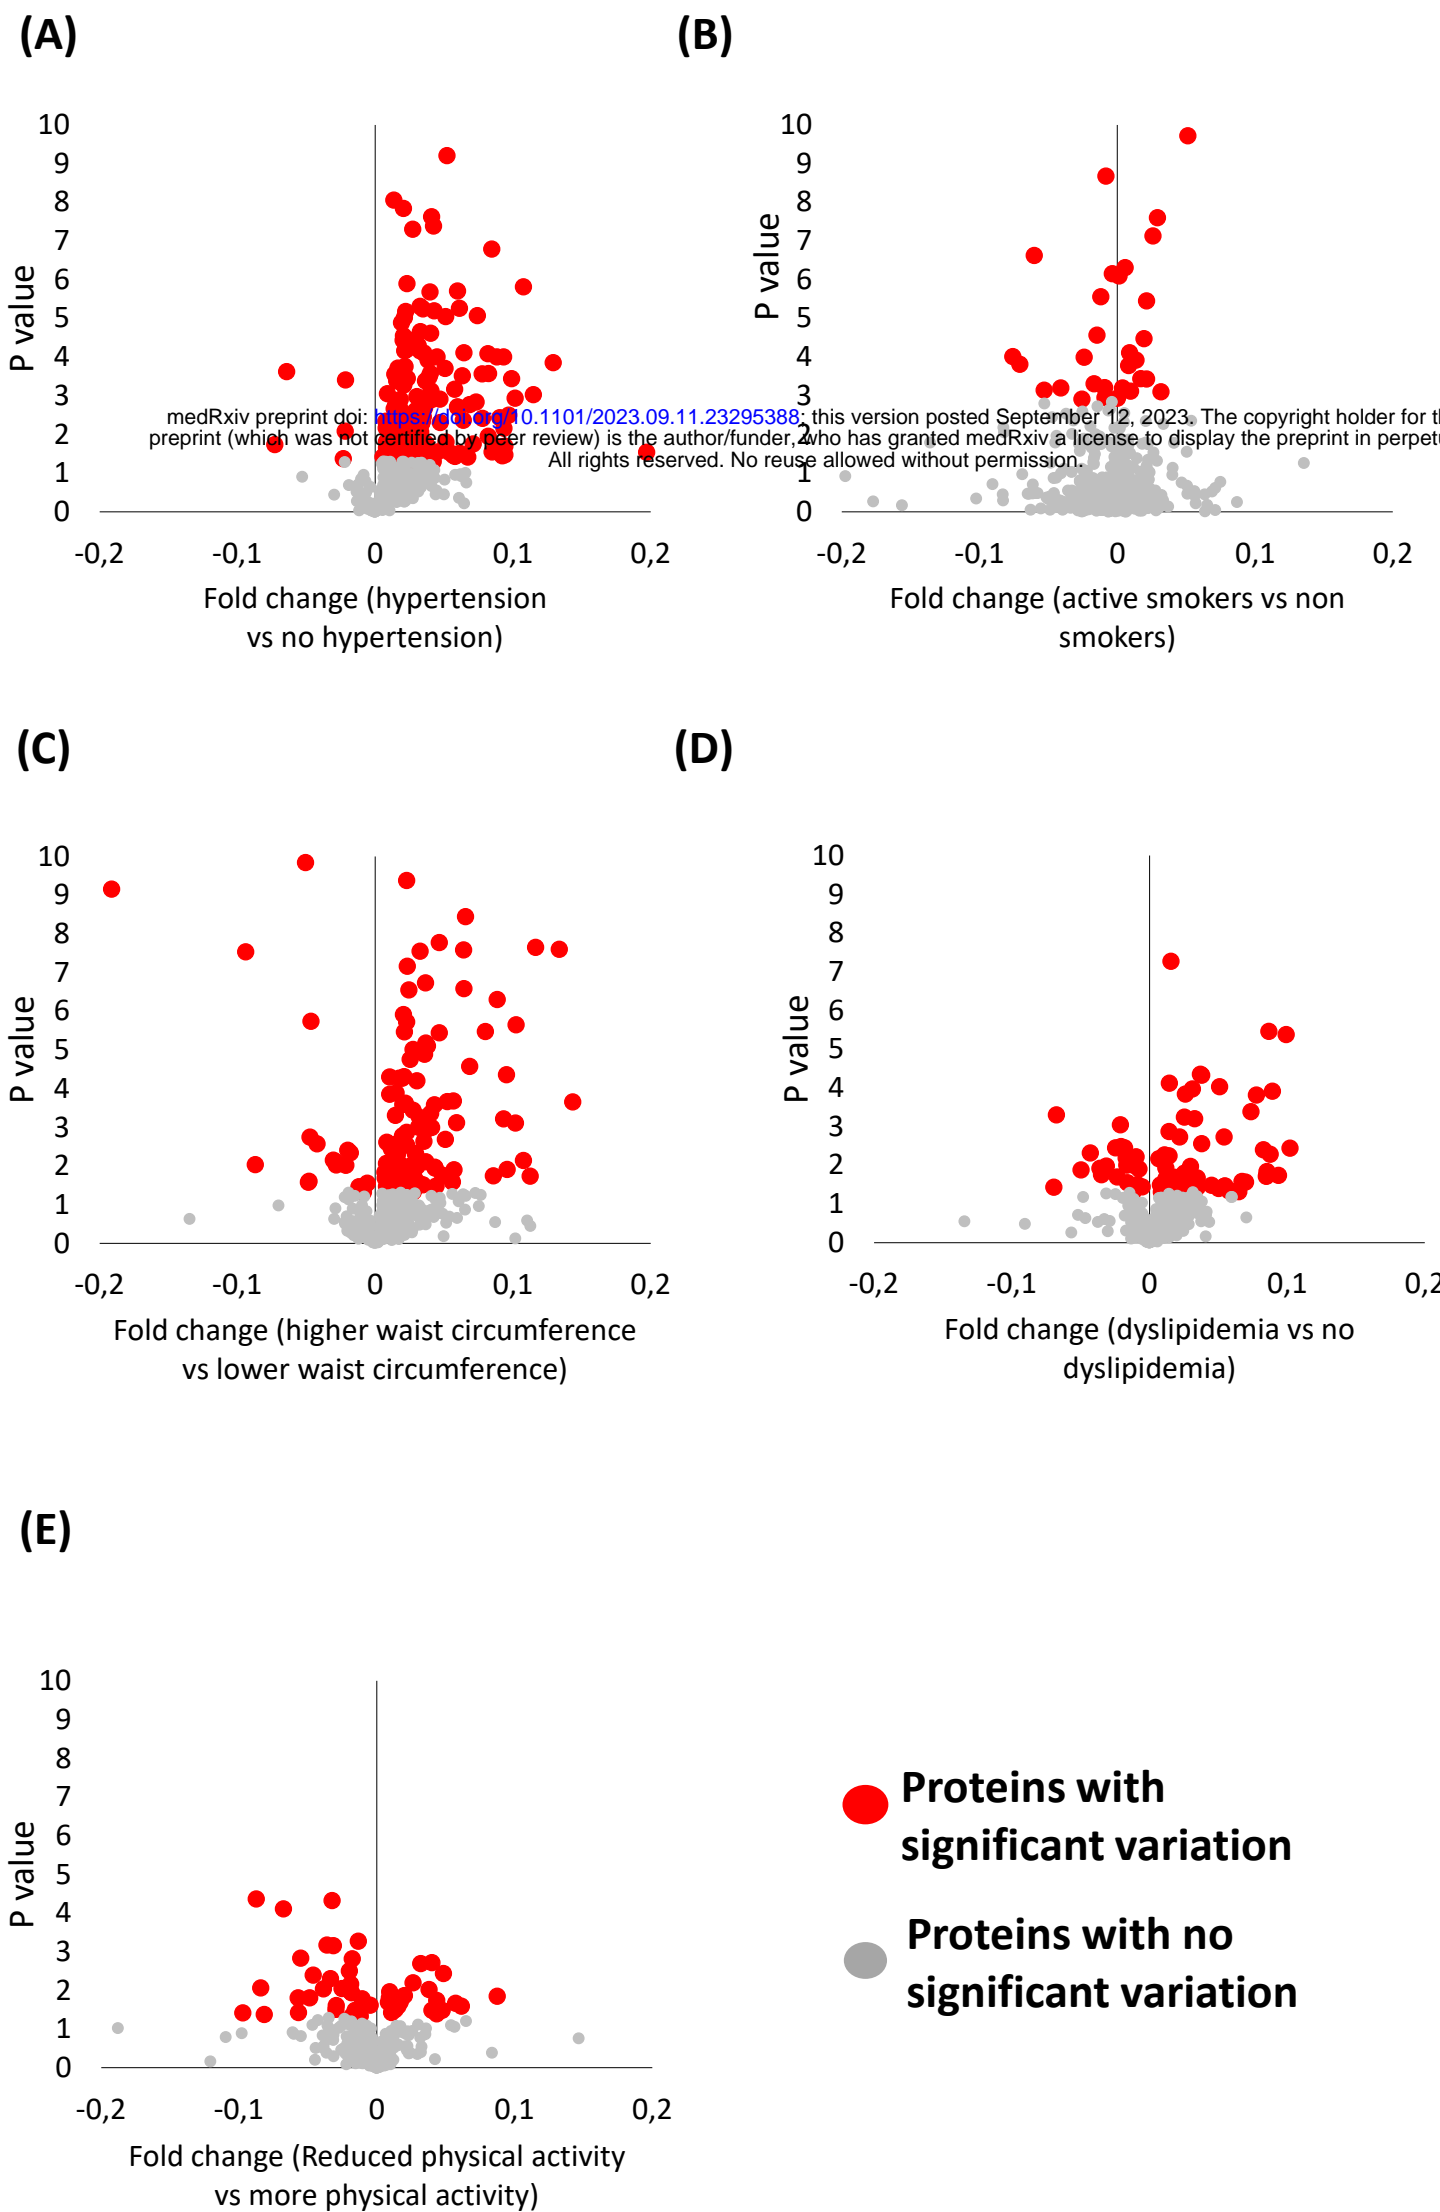

**Supplemental Figure 2.**
